# Supplementary material for: Maxwell's demon in biochemical signal transduction with feedback loop
Source: PubMed Central journal article supplement (PMC4557369; doi:10.1038/ncomms8498), 2015-06-23
Supplement: ncomms8498-s1.pdf [file ncomms8498-s1.pdf]

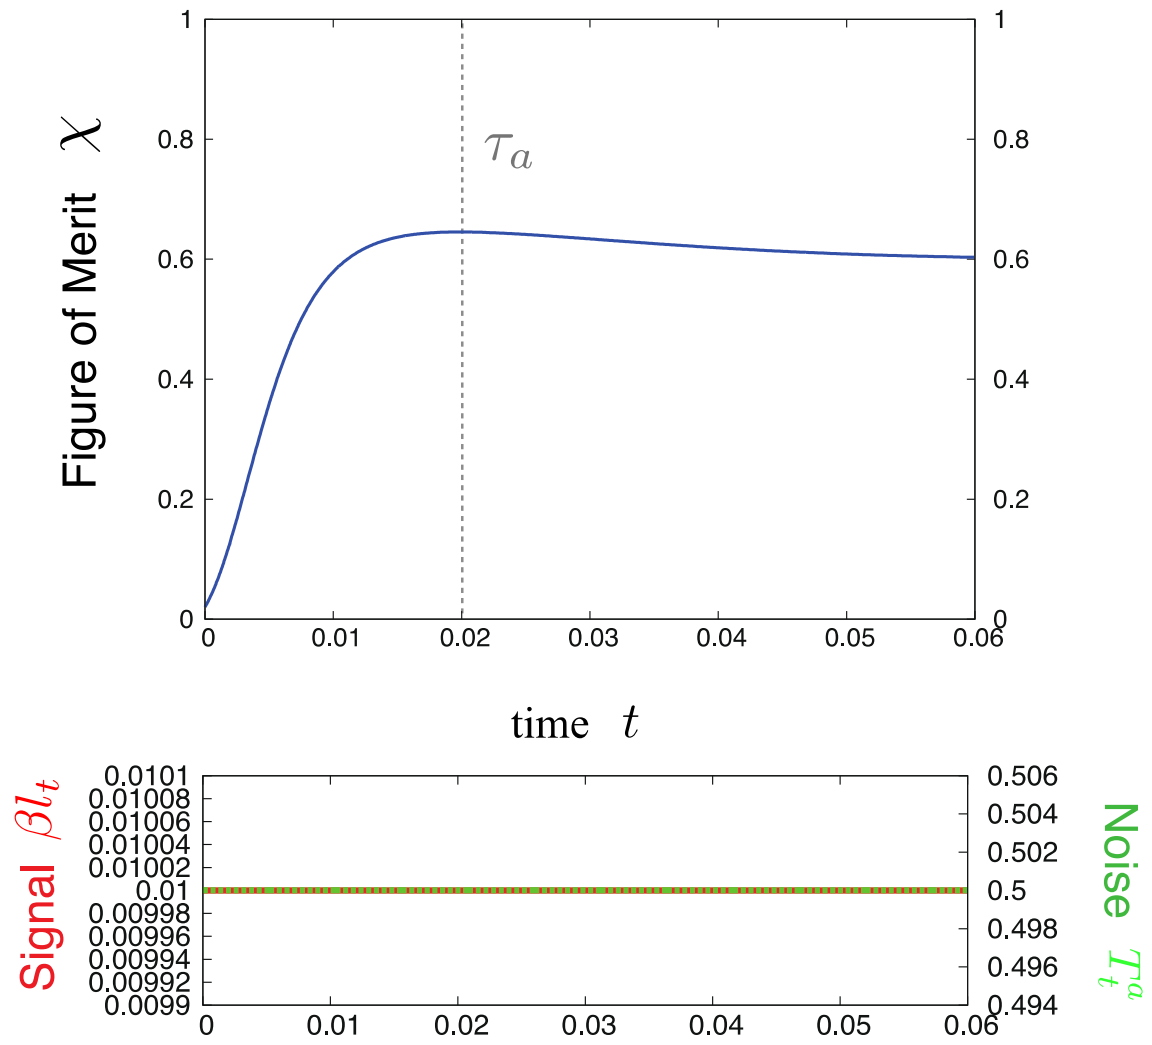

**Supplementary Figure 1 | A figure of merit of information thermodynamics: Step function.** The parameters are chosen as the same as in Fig. 4a in the main text.

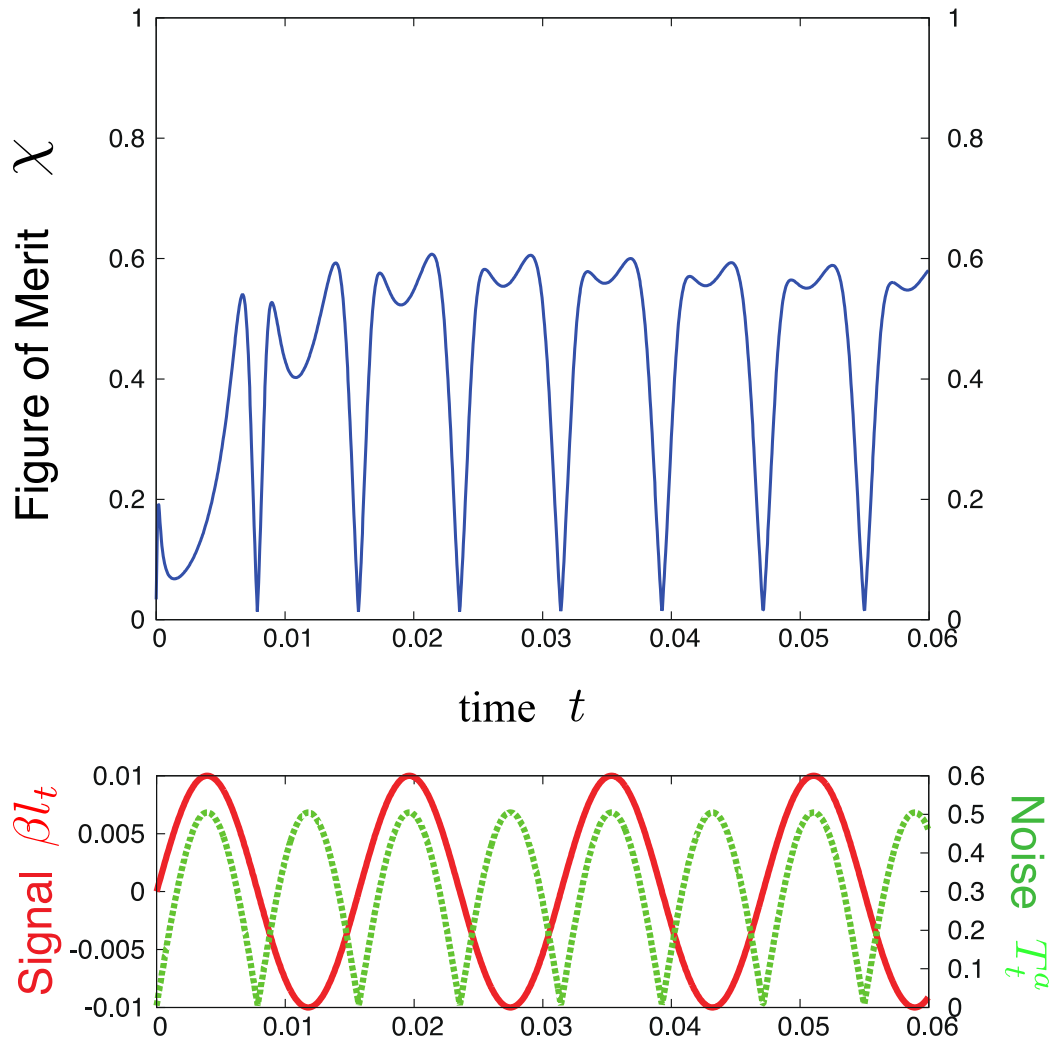

**Supplementary Figure 2 | A figure of merit of information thermodynamics: Sinusoidal function.** The parameters are chosen as the same as in Fig. 4b in the main text.

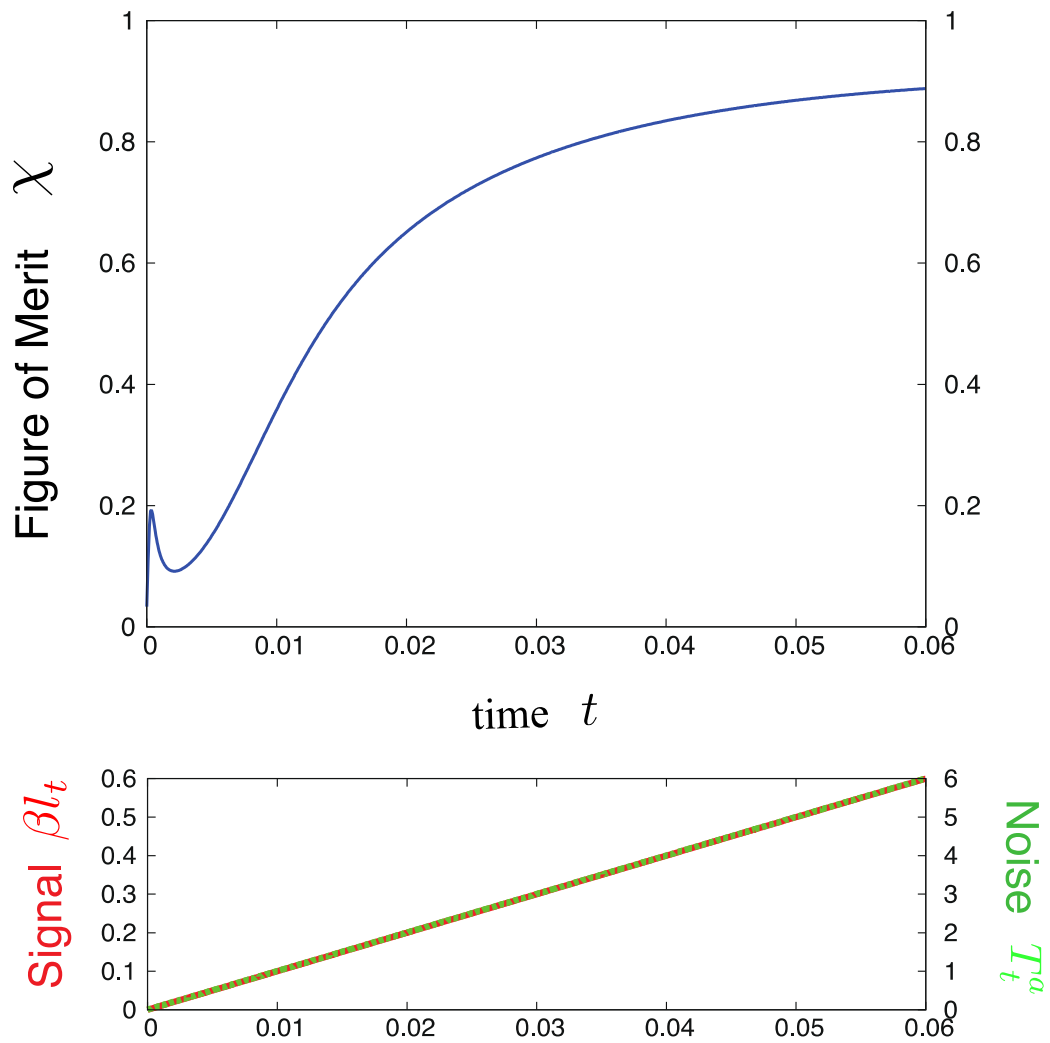

**Supplementary Figure 3 | A figure of merit of information thermodynamics: Linear function.** The parameters are chosen as the same as in Fig. 4c in the main text.

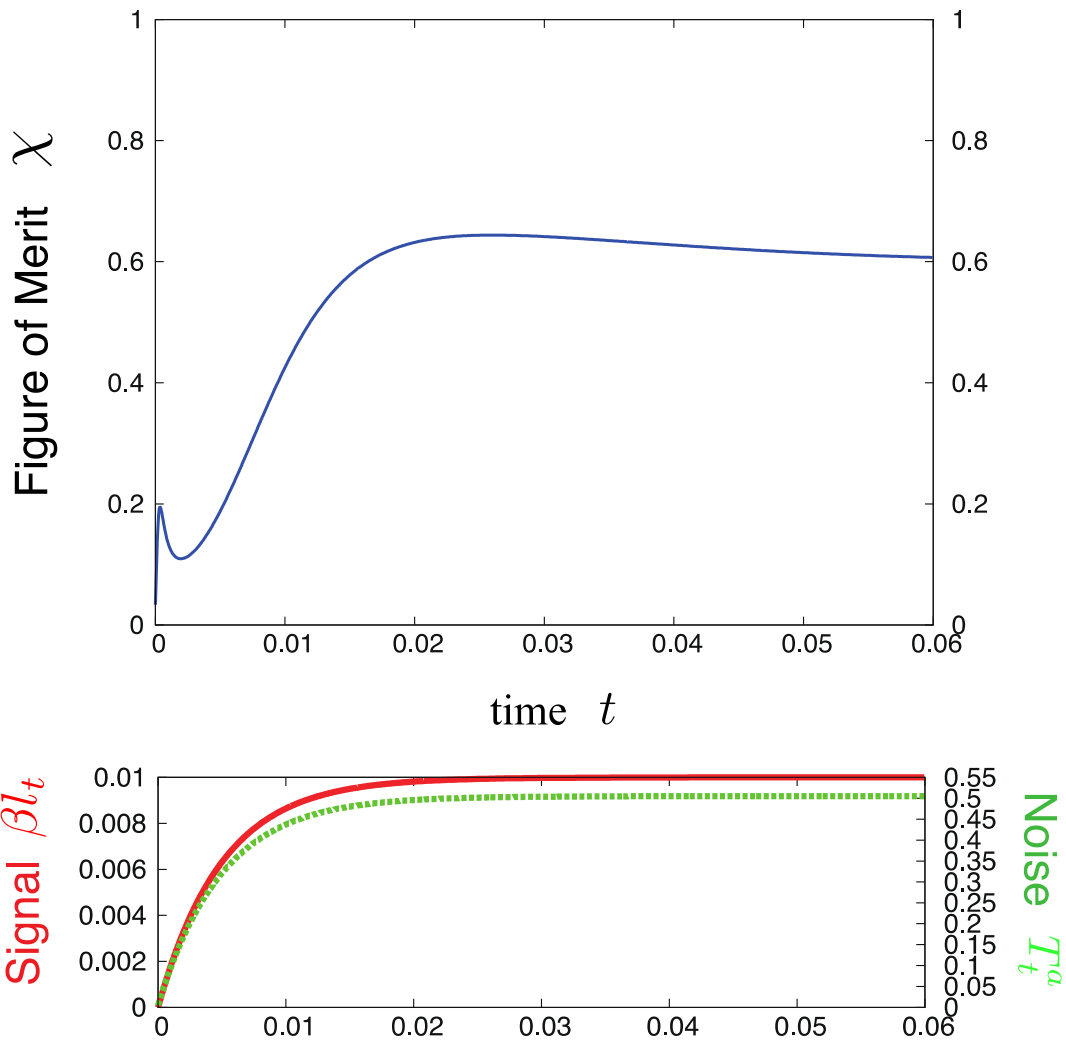

**Supplementary Figure 4 | A figure of merit of information thermodynamics: Exponential decay.** The parameters are chosen as the same as in Fig. 4d in the main text.

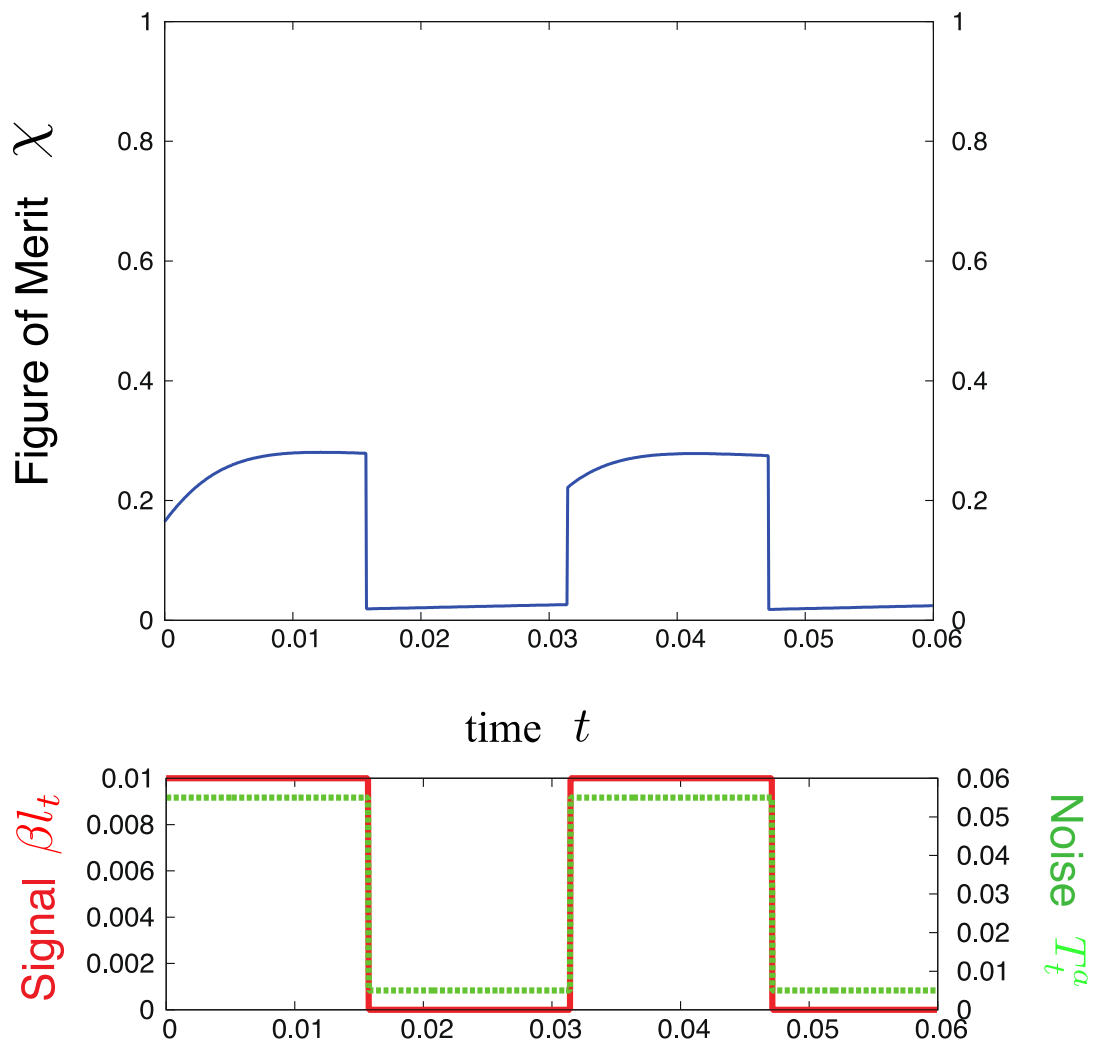

**Supplementary Figure 5 | A figure of merit of information thermodynamics: Square wave.** The parameters are chosen as the same as in Fig. 4e in the main text.

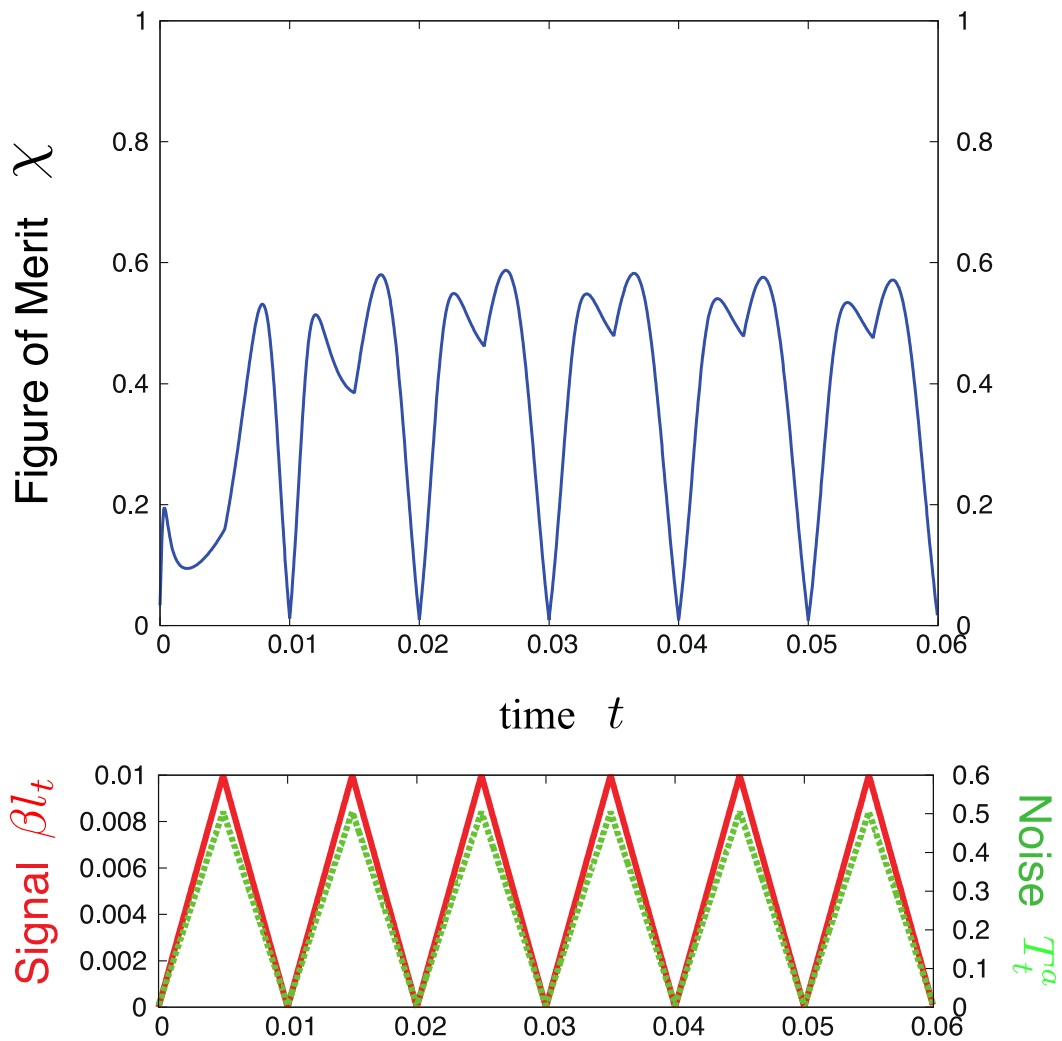

**Supplementary Figure 6 | A figure of merit of information thermodynamics: Triangle wave.** The parameters are chosen as the same as in Fig. 4f in the main text.

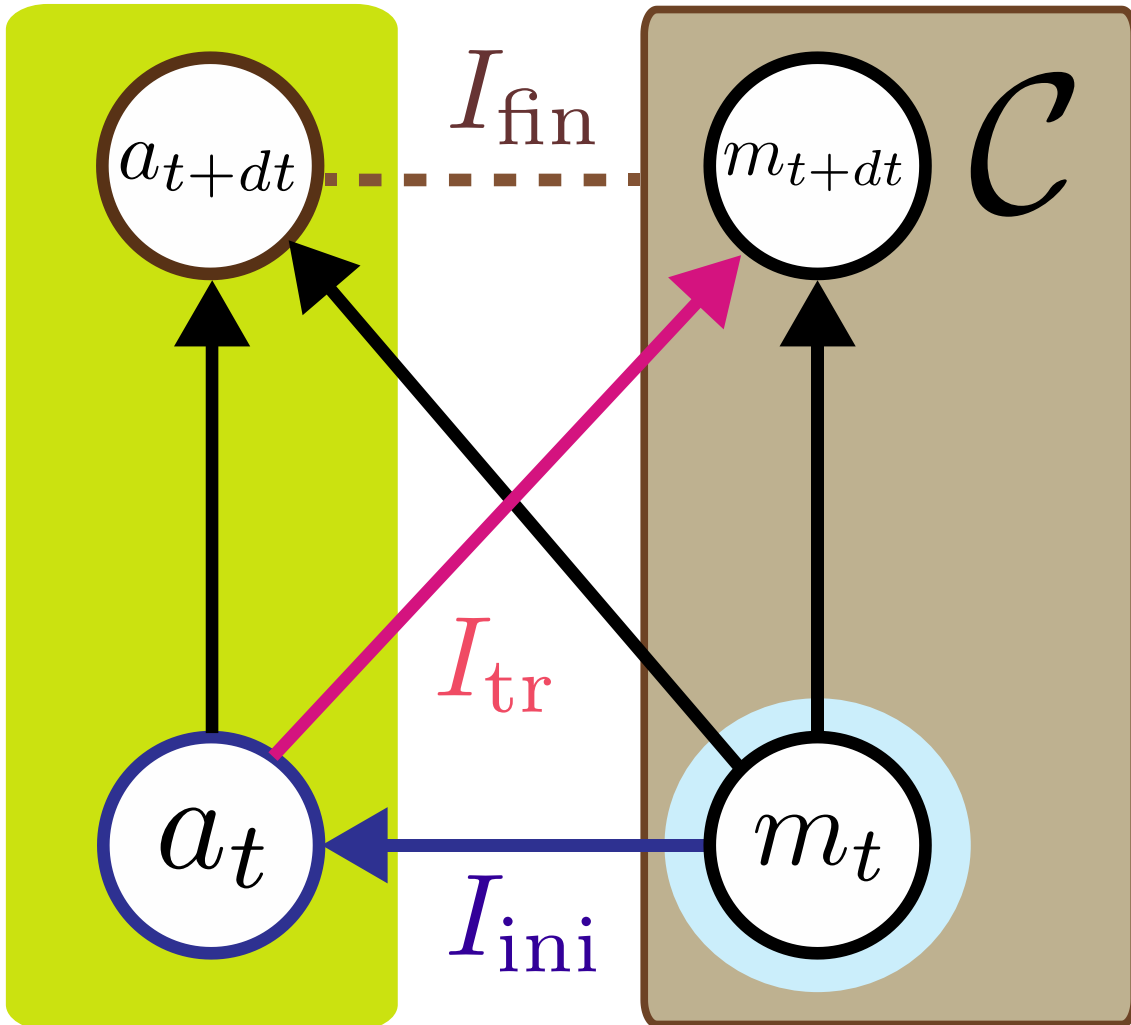

**Supplementary Figure 7 | A Bayesian network corresponding to Eq. (22) in Supplementary note 3.** This Bayesian network gives the joint probability Eq. (2), where a node represents a random variable and an edge represents a causal relationship. Due to a general framework of information thermodynamics<sup>4</sup>, information of initial correlation  $I_{ini}$  is characterized by the mutual information between  $a_t$  and  $m_t$ , the information of final correlation  $I_{fin}$  is characterized by the mutual information between  $a_{t+dt}$  and  $\{m_t, m_{t+dt}\}$ , and the transfer entropy  $I_{tr}$  from the subsystem  $a$  to the other system  $C$  is characterized by the conditional mutual information between  $a_t$  and  $m_{t+dt}$  under the condition of  $m_t$ . These information quantities  $I_{ini}$ ,  $I_{fin}$ , and  $I_{tr}$  give a lower bound of the entropy production in the subsystem  $a$ .

**Supplementary note 1 | Explicit expression of the information-thermodynamic dissipation.**

We consider the coupled Langevin equations (2) in the main text,

$$\dot{a}_t = -\frac{1}{\tau^a} [a_t - \bar{a}_t(m_t, l_t)] + \xi_t^a, \quad (1)$$

$$\dot{m}_t = -\frac{1}{\tau^m} a_t + \xi_t^m, \quad (2)$$

where  $\xi_t^x$  ( $x = a, m$ ) is a white Gaussian noise with the variance  $T_t^x$ :  $\langle \xi_t^x \rangle = 0$ , and  $\langle \xi_t^x \xi_{t'}^x \rangle = 2T_t^x \delta_{xx'} \delta(t - t')$ . In the model of *E. coli* bacterial chemotaxis given by Eqs. (1) and (2) with  $\bar{a}_t(m_t, l_t) = \alpha m_t - \beta l_t$ , we can analytically calculate the information-thermodynamic dissipation in the stationary state:

$$\begin{aligned} dI_t^{\text{tr}} - \frac{J_t^a}{T_t^a} dt \\ = \frac{[\langle a_t^2 \rangle - \langle a_t \rangle^2][1 - (\rho_t^{am})^2] dt}{4(\tau^m)^2 T_t^m} + \frac{dt}{\tau^a T_t^a} \left[ \frac{1}{\tau^a} \langle (a_t - \bar{a}_t)^2 \rangle - T_t^a \right]. \end{aligned} \quad (3)$$

When this quantity becomes zero, the equality in inequality (5) in the main text is achieved. With the linear approximation  $\bar{a}_t(m_t, l_t) = \alpha m_t - \beta l_t$ , we can explicitly calculate the stationary value of  $\langle a_t \rangle$ ,  $\langle m_t \rangle$ ,  $\langle a_t^2 \rangle$ ,  $\langle a_t m_t \rangle$  and  $\langle m_t^2 \rangle$  as

$$\langle a_t \rangle_{\text{SS}} = 0, \quad (4)$$

$$\langle m_t \rangle_{\text{SS}} = \beta \alpha^{-1} l_t, \quad (5)$$

$$\langle a_t^2 \rangle_{\text{SS}} = \alpha \tau^m T_t^m + \tau^a T_t^a, \quad (6)$$

$$\langle a_t m_t \rangle_{\text{SS}} = \tau^m T_t^m, \quad (7)$$

$$\langle m_t^2 \rangle_{\text{SS}} = (\beta \alpha^{-1} l_t)^2 + \alpha^{-1} \tau^m T_t^m + \tau^a \alpha^{-1} (\tau^m)^{-1} [\alpha \tau^m T_t^m + \tau^a T_t^a]. \quad (8)$$

The information-thermodynamic dissipation (3) then reduces to



$$\begin{aligned}
& dI_t^{\text{tr}} - \frac{J_t^a}{T_t^a} dt \\
&= dt[\alpha T_t^m + \tau^a(\tau^m)^{-1}T_t^a] \left[ \frac{\alpha}{\tau^a T_t^a} + \frac{1 - (\rho_t^{am})^2}{4\tau^m T_t^m} \right] \geq 0, \tag{9}
\end{aligned}$$

where the correlation coefficient  $(\rho_t^{am})^2$  is given by

$$(\rho_t^{am})^2 = \frac{1}{[1+\tau^a(\tau^m)^{-1}[\alpha+\tau^a T_t^a(\tau^m T_t^m)^{-1}][1+\tau^a T_t^a(\alpha\tau^m T_t^m)^{-1}]} \leq 1. \tag{10}$$

In the limit of  $\alpha \rightarrow 0$  and  $\tau^a/\tau^m \rightarrow 0$ , the information-thermodynamic dissipation (3) can be zero, and the equality in Eq. (5) in the main text is achieved such that

$$dI_t^{\text{tr}} = \frac{J_t^a}{T_t^a} dt = 0. \tag{11}$$

This corresponds to the situation where the feedback loop does not work ( $\alpha \rightarrow 0$ ) and the information flow vanishes, and  $a$  relaxes infinitely fast ( $\tau^a/\tau^m \rightarrow 0$ ).

## Supplementary note 2 | Detailed derivation of the second law of information thermodynamics.

Here, we show the detailed derivation of the second law of information thermodynamics for Eqs. (1) and (2) [Eq. (4) in the main text]:

$$\Xi_t^{\text{info}} := dI_t^{\text{tr}} + dS_t^{a|m} \geq \frac{J_t^a}{T_t^a} dt, \tag{12}$$

where  $dS_t^{a|m} := S[a_{t+dt}|m_{t+dt}] - S[a_t|m_t]$  is the conditional Shannon entropy change of  $a$  with  $S[a_t|m_t] := -\int da_t dm_t p[a_t, m_t] \ln p[a_t|m_t]$ , and  $dI_t^{\text{tr}}$  is the transfer entropy from  $a$  to  $m$  at time  $t$ :

$$dI_t^{\text{tr}} := \int dm_{t+dt} da_t dm_t p[m_{t+dt}, a_t, m_t] \ln \frac{p[m_{t+dt}|a_t, m_t]}{p[m_{t+dt}|m_t]}, \tag{13}$$

The heat absorption<sup>1</sup>  $J_t^a$  is defined as the ensemble average of the Stratonovich product of the force  $\xi_t^a - \dot{a}_t$  and the velocity  $\dot{a}_t$  such that

$$J_t^a := \langle (\xi_t^a - \dot{a}_t) \circ \dot{a}_t \rangle, \tag{14}$$

The heat absorption  $J_t^a$  can be rewritten by Eq. (3) in the main text:

$$\begin{aligned}
J_t^a &= \langle (\xi_t^a - \dot{a}_t) \circ \dot{a}_t \rangle \\
&= \frac{1}{\tau^a} \left[ \langle (a_t - \bar{a}_t) \circ \xi_t^a \rangle - \frac{1}{\tau^a} \langle (a_t - \bar{a}_t)^2 \rangle \right]
\end{aligned}$$

$$= \frac{1}{\tau^a} \left[ T_t^a - \frac{1}{\tau^a} \langle (a_t - \bar{a}_t)^2 \rangle \right], \quad (15)$$

where we used the relation of the Stratonovich integral<sup>1</sup>  $\langle f(a_t, m_t, l_t) \circ \xi_t^a \rangle = T_t^a \langle \partial_{a_t} f(a_t, m_t, l_t) \rangle$  for any function  $f$ .

From the detailed fluctuation theorem<sup>2</sup>,  $J_t^a dt / T_t^a$  can be rewritten as a ratio of the probability distribution. Let the backward path-probability  $p_B[a_t | a_{t+dt}, m_t]$  be  $p_B[a_t | a_{t+dt}, m_t] := \mathcal{G}(a_t; a_{t+dt}; m_t)$ , where  $\mathcal{G}$  is given by the path-integral expression:

$$p[a_{t+dt} | a_t, m_t] = \mathcal{N} \exp \left[ -\frac{dt}{4T_t^a} \left( \frac{a_{t+dt} - a_t}{dt} + \frac{1}{\tau^a} (a_t - \bar{a}_t) \right)^2 \right] \quad (16)$$

$$=: \mathcal{G}(a_{t+dt}; a_t; m_t). \quad (17)$$

$\mathcal{N}$  is the normalization constant, so that  $\int da_{t+dt} \mathcal{G}(a_{t+dt}; a_t; m_t) = 1$  is satisfied.

The backward path probability also satisfies the normalization condition

$\int da_t p_B[a_t | a_{t+dt}, m_t] = \int da_t \mathcal{G}(a_t; a_{t+dt}; m_t) = 1$ . Up to order  $dt$ , the entropy change in the heat bath with temperature  $T_t^a$  is calculated as

$$\frac{J_t^a}{T_t^a} dt := \int da_{t+dt} da_t dm_t p[a_{t+dt}, a_t, m_t] \ln \frac{p_B[a_t | a_{t+dt}, m_t]}{p[a_{t+dt} | a_t, m_t]}, \quad (18)$$

which is well known as the detailed fluctuation theorem<sup>2</sup>.

Because of the noise independence  $\langle \xi_t^a \xi_{t'}^m \rangle = 0$ , we have  $p[a_{t+dt}, m_{t+dt}, a_t, m_t] = p[a_{t+dt} | a_t, m_t] p[m_{t+dt} | a_t, m_t] p[a_t, m_t]$ . From Eqs. (13) and (18), the difference  $\Xi_t^{\text{info}} - J_t^a dt / T_t^a$  is calculated as

$$\Xi_t^{\text{info}} - \frac{J_t^a}{T_t^a} dt = \left\langle \ln \frac{p[a_{t+dt}, m_{t+dt}, a_t, m_t]}{p[a_{t+dt} | m_{t+dt}] p_B[a_t | a_{t+dt}, m_t] p[m_{t+dt}, m_t]} \right\rangle. \quad (19)$$

The quantity  $\mathcal{Q}[a_{t+dt}, m_{t+dt}, a_t, m_t] := p[a_{t+dt} | m_{t+dt}] p_B[a_t | a_{t+dt}, m_t] p[m_{t+dt}, m_t]$  satisfies the normalization condition of the probability:

$$\int da_{t+dt} dm_{t+dt} da_t dm_t \mathcal{Q}[a_{t+dt}, m_{t+dt}, a_t, m_t] = 1. \quad (20)$$

Therefore,  $\mathcal{Q}[a_{t+dt}, m_{t+dt}, a_t, m_t]$  can be interpreted as the probability distribution of  $(a_{t+dt}, m_{t+dt}, a_t, m_t)$ , and the difference  $\Xi_t^{\text{info}} - J_t^a dt / T_t^a$  is rewritten as the Kullback-Libler divergence  $D_{KL}(p || \mathcal{Q})$ <sup>3</sup>:

$$\Xi_t^{\text{info}} - \frac{J_t^a}{T_t^a} dt$$

$$\begin{aligned}
&= \int da_{t+dt} dm_{t+dt} da_t dm_t p[a_{t+dt}, m_{t+dt}, a_t, m_t] \ln \frac{p[a_{t+dt}, m_{t+dt}, a_t, m_t]}{Q[a_{t+dt}, m_{t+dt}, a_t, m_t]} \\
&:= D_{KL}(p||Q). \tag{21}
\end{aligned}$$

From the non-negativity of the Kullback-Leibler divergence<sup>3</sup> [i.e.,  $D_{KL}(p||Q) \geq 0$ ], we obtain Eq. (12).

**Supplementary note 3 | Relationship between information thermodynamics for two-dimensional Markov process and that in [S. Ito and T. Sagawa, Phys. Rev. Lett. 111, 180503 (2013)].**

In our previous paper<sup>4</sup>, we have derived a general framework of information thermodynamics and discussed information thermodynamics for the coupled Langevin equations. We here give another application of the general result in Ref. 4 to two-dimensional Markov processes such as the coupled Langevin equations (1) and (2). Here, we show that the general result in Ref. 4 is tighter than the information-thermodynamic inequality (12).

We first consider the path probability of a single time step from  $(a_t, m_t)$ , to  $(a_{t+dt}, m_{t+dt})$ . Due to the Markov property, the joint probability  $p[a_{t+dt}, m_{t+dt}, a_t, m_t]$  is given by

$$p[a_{t+dt}, m_{t+dt}, a_t, m_t] = p[a_{t+dt}|a_t, m_t]p[m_{t+dt}|a_t, m_t]p[a_t|m_t]p[m_t], \tag{22}$$

where the independency of the noise (i.e.,

$$p[a_{t+dt}, m_{t+dt}|a_t, m_t] = p[a_{t+dt}|a_t, m_t]p[m_{t+dt}|a_t, m_t]) \text{ is assumed.}$$

We next consider a Bayesian network, which represents the stochastic process of Eq. (22) (see Supplementary Fig. 7). This Bayesian network is given by the parents (denoted as “pa”) of the random variables:  $\text{pa}(a_t) = m_t$ ,  $\text{pa}(m_t) = \emptyset$ ,  $\text{pa}(a_{t+dt}) = \{a_t, m_t\}$  and  $\text{pa}(m_{t+dt}) = \{a_t, m_t\}$ . The stochastic process of Eq. (22) is given by  $p[a_{t+dt}, m_{t+dt}, a_t, m_t] = p[a_{t+dt}|\text{pa}(a_{t+dt})]p[m_{t+dt}|\text{pa}(m_{t+dt})]p[a_t|\text{pa}(a_t)]p[m_t|\text{pa}(m_t)]$ . This Bayesian network shows a single time step of the Markovian dynamics from time  $t$  to time  $t + dt$ .

Let stochastic mutual information

be  $I[\mathcal{A}_1 : \mathcal{A}_2] := \ln p[\mathcal{A}_1, \mathcal{A}_2] - \ln p[\mathcal{A}_1] - \ln p[\mathcal{A}_2]$ , and stochastic conditional mutual information

be  $I[\mathcal{A}_1 : \mathcal{A}_2 | \mathcal{A}_3] := \ln p[\mathcal{A}_1, \mathcal{A}_2 | \mathcal{A}_3] - \ln p[\mathcal{A}_1 | \mathcal{A}_3] - \ln p[\mathcal{A}_2 | \mathcal{A}_3]$ , where  $\mathcal{A}_1, \mathcal{A}_2$

and  $\mathcal{A}_3$  are any set of random variables. From the argument in Ref. 4, the bound of the entropy production for the subsystem  $a$  is given by an informational quantity  $\Theta$ , which corresponds to the Bayesian network shown in Supplementary Fig. 7:

$$\Theta := I_{\text{fin}} - I_{\text{ini}} - \sum_{l=1}^2 I_{\text{tr}}^l, \quad (23)$$

$$\begin{aligned} I_{\text{fin}} &= I[x_2: \mathcal{C}] \\ &= I[a_{t+dt}: \{m_t, m_{t+dt}\}], \end{aligned} \quad (24)$$

$$\begin{aligned} I_{\text{ini}} &= I[x_1: \text{pa}(x_1)] \\ &= I[a_t: m_t], \end{aligned} \quad (25)$$

$$\begin{aligned} I_{\text{tr}}^1 &= I[c_1: \text{pa}_X(c_1)] \\ &= 0, \end{aligned} \quad (26)$$

$$\begin{aligned} I_{\text{tr}}^2 &= I[c_2: \text{pa}_X(c_2)|c_1] \\ &= I[m_{t+dt}: a_t|m_t], \end{aligned} \quad (27)$$

where we set  $X := \{x_1 = a_t, x_2 = a_{t+dt}\}$ ,  $\mathcal{C} := \{c_1 = m_t, c_2 = m_{t+dt}\}$ ,  $\text{pa}_X(m_t) := \text{pa}(m_t) \cap X = \emptyset$ , and  $\text{pa}_X(m_{t+dt}) := \text{pa}(m_{t+dt}) \cap X = a_t$ . Let the entropy production in the subsystem during the infinitesimal time step be  $\sigma_t := \ln p(a_t) - \ln p(a_{t+dt}) + \Delta S_t^{\text{bath}}$ , where  $\Delta S_t^{\text{bath}}$  is the entropy change in the heat baths. Again from the argument in Ref. 4, we have inequality  $\langle \sigma \rangle \geq \langle \Theta \rangle$ , where

$$\langle \Theta \rangle = \langle I[a_{t+dt}: \{m_t, m_{t+dt}\}] \rangle - \langle I[a_t: \{m_t, m_{t+dt}\}] \rangle \quad (28)$$

$$= I_{t+dt}^{am} - I_t^{am} + dI_t^{\text{Btr}} - dI_t^{\text{tr}}. \quad (29)$$

$I_t^{am} := \langle I[a_t: m_t] \rangle$  is the mutual information between  $a$  and  $m$  at time  $t$ ,  $dI_t^{\text{tr}} := \langle \ln p[m_{t+dt}|a_t, m_t] \rangle - \langle \ln p[m_{t+dt}|m_t] \rangle$  is the transfer entropy from  $a$  to  $m$  at time  $t$ , and  $dI_t^{\text{Btr}}$  is defined as the conditional mutual information  $dI_t^{\text{Btr}} = \langle I[m_t: a_{t+dt}|m_{t+dt}] \rangle$ . We note that Eq. (28) is consistent with information flow in several papers<sup>5-8</sup>.

For the two-dimensional Langevin system Eqs. (1) and (2), the ensemble average of the entropy production for the subsystem  $\langle \sigma \rangle$  can be rewritten by the heat absorption  $J_t^a$ ,  $\langle \sigma \rangle = -J_t^a dt / T_t^a + \langle \ln p[a_t] \rangle - \langle \ln p[a_{t+dt}] \rangle$  with  $\langle \Delta S_t^{\text{bath}} \rangle = -J_t^a dt / T_t^a$ . From  $\langle \sigma \rangle \geq \langle \Theta \rangle$ , we have the following inequality:

$$\frac{J_t^a}{T_t^a} dt \leq -dI_t^{\text{Btr}} + dI_t^{\text{tr}} + dS_t^{a|m} \quad (30)$$

where we used Eq. (29) and identity  $dS_t^{a|m} = \langle \ln p[a_t] \rangle - \langle \ln p[a_{t+dt}] \rangle - I_{t+dt}^{am} + I_t^{am}$ . Because of the non-negativity of the mutual information<sup>3</sup> [i.e.,  $dI_t^{\text{Btr}} \geq 0$ ], we have inequality (12) [Eq. (4) in the main text]:

$$\frac{J_t^a}{T_t^a} dt \leq -dI_t^{\text{Btr}} + dI_t^{\text{tr}} + dS_t^{a|m} \quad (31)$$

$$\leq dI_t^{\text{tr}} + dS_t^{a|m}. \quad (32)$$

The conditional mutual information  $dI_t^{\text{Btr}}$  would be important as well as the transfer entropy  $dI_t^{\text{tr}}$ , because the bound including  $dI_t^{\text{Btr}}$  [Eq. (31)] is tighter than the bound without  $dI_t^{\text{Btr}}$  [Eq. (32)]. However, in the main text, we only focus on the role of the transfer entropy  $dI_t^{\text{tr}}$  for the sake of simplicity, by applying the weaker inequality (32).

#### Supplementary note 4 | Analytical calculation of the transfer entropy for the coupled linear Langevin system.

We derive the analytical expression of the transfer entropy for the coupled linear Langevin system:

$$\begin{aligned} \dot{x}_t^1 &= \sum_j^2 \mu_t^{1j} x_t^j + f_t^1 + \xi_t^1, \\ \dot{x}_t^2 &= \sum_j^2 \mu_t^{2j} x_t^j + f_t^2 + \xi_t^2, \\ \langle \xi_t^i \xi_{t'}^j \rangle &= 2T_t^i \delta_{ij} \delta(t - t'), \\ \langle \xi_t^i \rangle &= 0, \end{aligned} \quad (33)$$

where  $i, j=1, 2$ ,  $f_t^i$  and  $\mu_t^{ij}$  are the time-dependent constants,  $T_t^i$  is time-dependent variance of the white Gaussian noise  $\xi_t^i$ , and  $\langle \dots \rangle$  denotes the ensemble average. In the main text, we considered the model of the *E. coli* bacterial chemotaxis given by Eqs. (1) and (2) with  $\bar{a}_t(m_t, l_t) = \alpha m_t - \beta l_t$ . To compare Eqs. (1) and (2), we set  $\{x_t^1, x_t^2\} = \{a_t, m_t\}$ ,  $\mu_t^{11} = -1/\tau^a$ ,  $\mu_t^{12} = \alpha/\tau^a$ ,  $f_t^1 = -\beta l_t/\tau^a$ ,  $\mu_t^{21} = -1/\tau^m$ ,  $\mu_t^{22} = 0$ ,  $f_t^2 = 0$ ,  $T_t^1 = T_t^a$ , and  $T_t^2 = T_t^m$ . The transfer entropy from the target system  $x^1$  to the other system  $x^2$  at time  $t$  is defined as

$$dI_t^{\text{tr}} := \langle \ln p[x_{t+dt}^2 | x_t^1, x_t^2] \rangle - \langle \ln p[x_{t+dt}^2 | x_t^2] \rangle.$$

Here, we analytically calculate the transfer entropy for the case that the joint probability  $p[x_t^1, x_t^2]$  is a Gaussian distribution:

$$p[x_t^1, x_t^2] = \frac{1}{2\pi\sqrt{\det\Sigma_t}} \exp\left[-\sum_{ij} \frac{1}{2} \bar{x}_t^i G_t^{ij} \bar{x}_t^j\right], \quad (34)$$

where  $\Sigma_t$  is the covariant matrix  $\Sigma_t^{ij} = \langle \bar{x}_t^i \bar{x}_t^j \rangle$ , and  $\bar{x}_t^i = x_t^i - \langle x_t^i \rangle$ . The inverse matrix  $G_t = (\Sigma_t)^{-1}$  satisfies  $\sum_j G_t^{ij} \Sigma_t^{jl} = \delta_{il}$  and  $G_t^{ij} = G_t^{ji}$ . The joint distribution  $p[x_t^2]$  is given by the Gaussian probability:

$$p[x_t^2] = \frac{1}{\sqrt{2\pi\Sigma_t^{22}}} \exp\left[-\frac{1}{2}(\Sigma_t^{22})^{-1}(\bar{x}_t^2)^2\right], \quad (35)$$

We consider the path-integral expression of the Langevin equations (33). The conditional probability  $p[x_{t+dt}^2|x_t^1, x_t^2]$  is given by

$$\begin{aligned} p[x_{t+dt}^2|x_t^1, x_t^2] &= \mathcal{N} \exp\left[-\frac{dt}{4T_t^2} \left(\frac{x_{t+dt}^2 - x_t^2}{dt} - \sum_j^2 \mu_t^{2j} x_t^j - f_t^2\right)^2\right] \\ &= \mathcal{N} \exp\left[-\frac{dt}{4T_t^2} (F_t^2 - \mu_t^{21} \bar{x}_t^1)^2\right], \end{aligned} \quad (36)$$

where  $\mathcal{N}$  is the normalization constant with  $\int dx_{t+dt}^2 p[x_{t+dt}^2|x_t^1, x_t^2] = 1$ .

For the simplicity of notation, we set  $F_t^2 := (x_{t+dt}^2 - x_t^2)/dt - \mu_t^{22} \langle x_t^1 \rangle - \mu_t^{22} x_t^2 - f_t^2$ .

From Eqs. (34) and (36), we have the joint distribution  $p[x_{t+dt}^2, x_t^2]$  as

$$\begin{aligned} &p[x_{t+dt}^2, x_t^2] \\ &= \int dx_t^1 p[x_{t+dt}^2|x_t^1, x_t^2] p[x_t^1, x_t^2] \\ &= \frac{\mathcal{N}}{\sqrt{4\pi \det \Sigma_t \left(\frac{dt}{4T_t^2} (\mu_t^{21})^2 + \frac{G_t^{11}}{2}\right)}} \exp\left[-\frac{dt}{4T_t^2} (F_t^2)^2 - \frac{1}{2} G_t^{22} (\bar{x}_t^2)^2\right. \\ &\quad \left. + \frac{\left(G_t^{12} \bar{x}_t^2 - \frac{\mu_t^{21} F_t^2}{2T_t^2} dt\right)^2}{4 \left(\frac{dt}{4T_t^2} (\mu_t^{21})^2 + \frac{G_t^{11}}{2}\right)}\right]. \end{aligned} \quad (37)$$

From Eqs. (35), (36), and (37), we obtain the analytical expression of the transfer entropy  $dI_t^{\text{tr}}$  up to the order of  $dt$ :

$$\begin{aligned} dI_t^{\text{tr}} &= \langle \ln p[x_{t+dt}^2|x_t^1, x_t^2] \rangle + \langle \ln p[x_t^2] \rangle - \langle \ln p[x_{t+dt}^2, x_t^2] \rangle \end{aligned}$$

$$\begin{aligned}
&= -\frac{dt}{4T_t^2} \langle (F_t^2 - \mu_t^{21} \bar{x}_t^1)^2 \rangle - \frac{1}{2} \ln[2\pi \Sigma_t^{22}] - \frac{1}{2} (\Sigma_t^{22})^{-1} \langle (\bar{x}_t^2)^2 \rangle \\
&+ \frac{1}{2} \ln \left[ 4\pi \det \Sigma_t \left( \frac{dt}{4T_t^2} (\mu_t^{21})^2 + \frac{G_t^{11}}{2} \right) \right] + \frac{dt}{4T_t^2} \langle (F_t^2)^2 \rangle + \frac{1}{2} G_t^{22} \langle (\bar{x}_t^2)^2 \rangle \\
&+ \frac{\left\langle \left( G_t^{12} \bar{x}_t^2 - \frac{\mu_t^{21} F_t^2}{2T_t^2} dt \right)^2 \right\rangle}{4 \left( \frac{dt}{4T_t^2} (\mu_t^{21})^2 + \frac{G_t^{11}}{2} \right)} \\
&= \frac{\mu_t^{21} dt}{2T_t^2} \langle F_t^2 \bar{x}_t^1 \rangle - \frac{dt}{4T_t^2} (\mu_t^{21})^2 \Sigma_t^{11} - \frac{1}{2} \ln[2\pi \Sigma_t^{22}] - \frac{1}{2} + \frac{(\mu_t^{21})^2 dt}{4G_t^{11} T_t^2} \\
&+ \frac{1}{2} G_t^{22} \Sigma_t^{22} - \frac{(G_t^{12})^2 \Sigma_t^{22}}{2G_t^{11}} \left[ 1 - \frac{(\mu_t^{21})^2 dt}{2G_t^{11} T_t^2} \right] + \frac{\mu_t^{21} dt}{2G_t^{11} T_t^2} G_t^{12} \langle F_t^2 \bar{x}_t^2 \rangle \\
&- \frac{(\mu_t^{21})^2 dt}{4G_t^{11} T_t^2} + \mathcal{O}(dt^2) \\
&= \frac{\mu_t^{21} dt}{2T_t^2} \langle F_t^2 \bar{x}_t^1 \rangle + \frac{\mu_t^{21} dt}{2G_t^{11} T_t^2} G_t^{12} \langle F_t^2 \bar{x}_t^2 \rangle - \frac{(\mu_t^{21})^2 dt}{4G_t^{11} T_t^2} + \mathcal{O}(dt^2) \\
&= \frac{(\mu_t^{21})^2 \det \Sigma_t}{4T_t^2 \Sigma_t^{22}} dt + \mathcal{O}(dt^2) \\
&= \frac{1}{2} \ln \left( 1 + \frac{dP_t}{N_t} \right) + \mathcal{O}(dt^2), \tag{38}
\end{aligned}$$

where we define  $dP_t := (\mu_t^{21})^2 (\det \Sigma_t) dt / (\Sigma_t^{22})$ , and  $N_t = 2T_t^2$ . In this calculation, we used  $G_t^{ij} = G_t^{ji}$ ,  $\Sigma_t^{ij} = \Sigma_t^{ji}$ ,  $G_t^{i1} \Sigma_t^{1l} + G_t^{i2} \Sigma_t^{2l} = \delta_{il}$ ,  $\langle (F_t^2)^2 \rangle dt^2 = 2T_t^2 dt + \mathcal{O}(dt^2)$ ,  $\langle F_t^2 \bar{x}_t^1 \rangle = \mu_t^{21} \Sigma_t^{11}$ ,  $\langle F_t^2 \bar{x}_t^2 \rangle = \mu_t^{21} \Sigma_t^{12}$ , and  $G_t^{11} = (\Sigma_t^{22}) / (\det \Sigma_t)$ .

In the model of the *E. coli* bacterial chemotaxis, we have  $N_t = 2T_t^m$  and

$$\begin{aligned}
dP_t &= \frac{1}{(\tau^m)^2} \frac{[\langle a_t^2 \rangle - \langle a_t \rangle^2][\langle m_t^2 \rangle - \langle m_t \rangle^2] - [\langle a_t m_t \rangle^2 - \langle a_t \rangle \langle m_t \rangle]^2}{\langle m_t^2 \rangle - \langle m_t \rangle^2} dt \\
&= \frac{1 - (\rho_t^{am})^2}{(\tau^m)^2} V_t^a dt, \tag{39}
\end{aligned}$$

where  $V_t^x := \langle x_t^2 \rangle - \langle x_t \rangle^2$  indicates the variance of  $x_t = a_t$  or  $x_t = m_t$ , and  $\rho_t^{am} := [\langle a_t m_t \rangle^2 - \langle a_t \rangle \langle m_t \rangle] / (V_t^a V_t^m)^{1/2}$  is the correlation coefficient of  $a_t$  and  $m_t$ . The correlation coefficient  $\rho_t^{am}$  satisfies  $-1 \leq \rho_t^{am} \leq 1$ , because of the Cauchy-Schwartz inequality. We note that, if the joint probability  $p[a_t, m_t]$  is Gaussian, the factor  $1 - (\rho_t^{am})^2$  can be rewritten by the mutual information  $I_t^{am}$  as

$$1 - (\rho_t^{am})^2 = \exp[-2I_t^{am}], \quad (40)$$

where  $I_t^{am}$  is defined as  $I_t^{am} := \langle \ln p[a_t, m_t] \rangle - \langle \ln p[a_t] \rangle - \langle \ln p[m_t] \rangle$ . This fact implies that, if the target system  $a_t$  and the other system  $m_t$  are strongly correlated (i.e.,  $I_t^{am} \rightarrow \infty$ ), no information flow exists (i.e.,  $dI_t^{\text{tr}} \rightarrow 0$ ).

From the analytical expression of the transfer entropy (38), we can analytically compare the conventional thermodynamic bound [i.e.,  $\Xi_t^{\text{SL}} := -J_t^m dt/T_t^m + dS_t^{am} \geq J_t^a dt/T_t^a$ ] with the information-thermodynamic bound (12) for the model of *E. coli* chemotaxis [Eqs. (1) and (2) with  $\bar{a}_t(m_t, l_t) = \alpha m_t - \beta l_t$ ] in a stationary state, where both of the Shannon entropy and the conditional Shannon changes vanish, i.e.,  $dS_t^{am} = 0$  and  $dS_t^{al} = 0$ . Thus, the conventional thermodynamic bound is given by the heat emission from  $m$  such that  $\Xi_t^{\text{SL}} := -J_t^m dt/T_t^m$  and the information-thermodynamic bound is given by the information flow such that  $\Xi_t^{\text{info}} := dI_t^{\text{tr}}$ . The information-thermodynamic bound is given by  $dI_t^{\text{tr}} = (1 - (\rho_t^{am})^2)[\langle a_t^2 \rangle - \langle a_t \rangle^2]dt/[4(\tau^m)^2 T_t^m]$ . The conventional thermodynamic bound is given by  $\Xi_t^{\text{SL}} := \langle a_t^2 \rangle dt/[(\tau^m)^2 T_t^m]$ . From  $-1 \leq \rho_t^{am} \leq 1$  and  $\langle a_t \rangle^2 \geq 0$ , we have inequality  $\Xi_t^{\text{SL}} \geq \Xi_t^{\text{info}}$ . This implies that the information-thermodynamic bound  $\Xi_t^{\text{info}}$  is tighter than the conventional bound  $\Xi_t^{\text{SL}}$  for the model of *E. coli* bacterial chemotaxis:

$$\Xi_t^{\text{SL}} \geq \Xi_t^{\text{info}} \geq \frac{J_t^a}{T_t^a} dt. \quad (41)$$



## Supplementary References

- <sup>1</sup>Sekimoto, K. *Stochastic Energetics* (Springer, New York, 2010).
- <sup>2</sup>Seifert, U. Stochastic thermodynamics, fluctuation theorems and molecular machines. *Rep. Prog. Phys.* **75**, 126001 (2012).
- <sup>3</sup>Cover, T. M. & Thomas, J. A. *Element of Information Theory* (John Wiley and Sons, New York, 1991).
- <sup>4</sup>Ito, S. & Sagawa, T. Information thermodynamics on causal networks. *Phys. Rev. Lett.* **111**, 180603 (2013).
- <sup>5</sup>Allahverdyan, A. E., Janzing, D., & Mahler, G. Thermodynamic efficiency of information and heat flow. *J. Stat. Mech.* (2009). P09011.
- <sup>6</sup>Hartich D., Barato A. C., & Seifert U. Stochastic thermodynamics of bipartite systems: transfer entropy inequalities and a Maxwell's demon interpretation. *J. Stat. Mech.* (2014). P02016.
- <sup>7</sup>Horowitz J. M. & Esposito M. Thermodynamics with continuous information flow. *Phys. Rev. X*, **4**, 031015 (2014).
- <sup>8</sup>Shiraishi N. & Sagawa T. Fluctuation theorem for partially masked nonequilibrium dynamics. *Phys. Rev. E*, **91**, 012130 (2015).
